# Supplementary material for: MET overexpression contributes to STAT4-PD-L1 signaling activation associated with tumor-associated, macrophages-mediated immunosuppression in primary glioblastomas
Source: PubMed Central journal article supplement — J Immunother Cancer. 2021 Oct 19;9(10):e002451. doi: 10.1136/jitc-2021-002451 (PMC8527154; doi:10.1136/jitc-2021-002451), 2021-10-19
Supplement: jitc-2021-002451supp001.pdf [file jitc-2021-002451supp001.pdf]

**Fig. S1**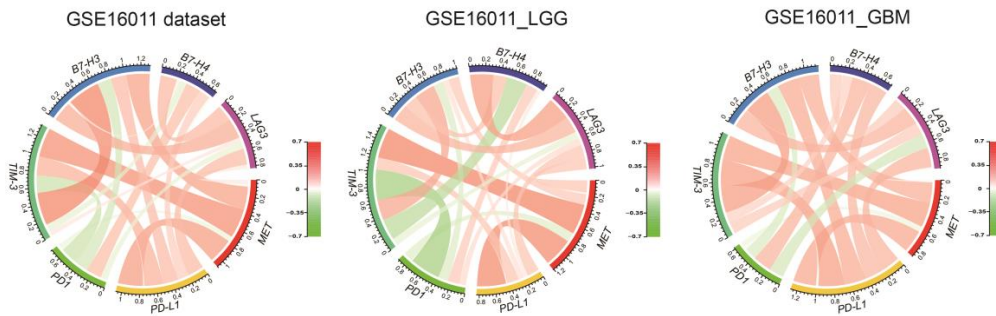

**Fig. S1** *MET* expression shows positive association with expression of *PD-L1* in GSE16011 dataset.

Fig. S2

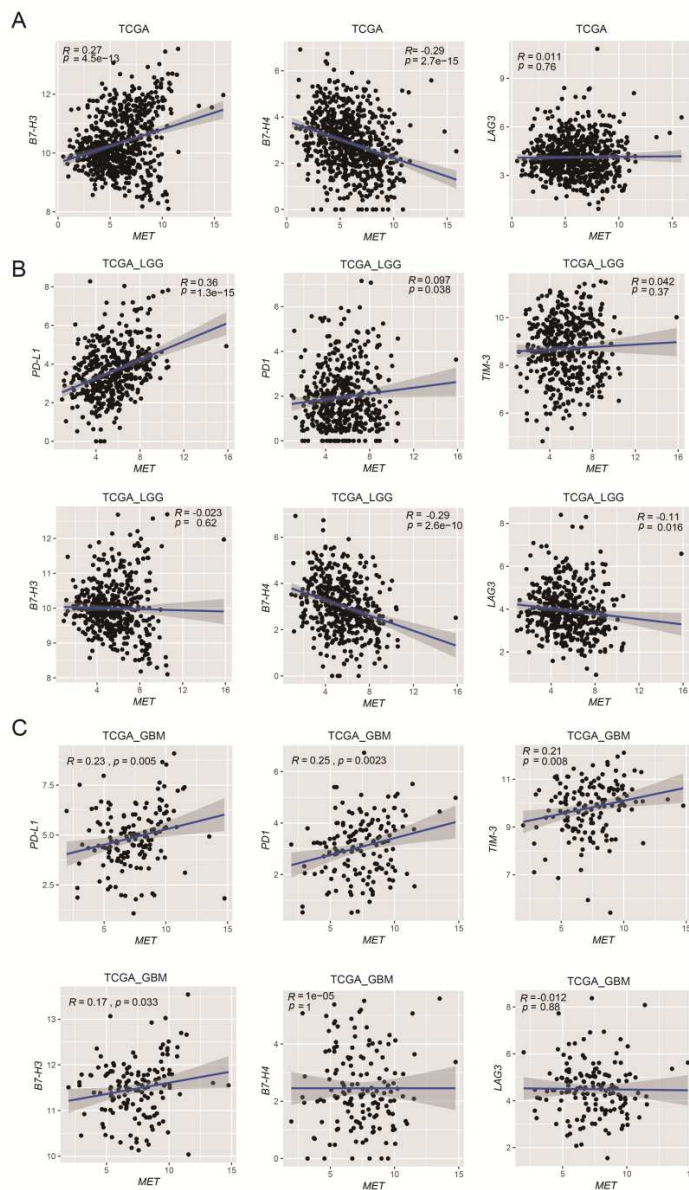

**Fig. S2** The scatter diagrams visualize the co-expression patterns of *MET* and checkpoint genes in all grade gliomas (A), LGG (B) and GBM (C).

Fig. S3

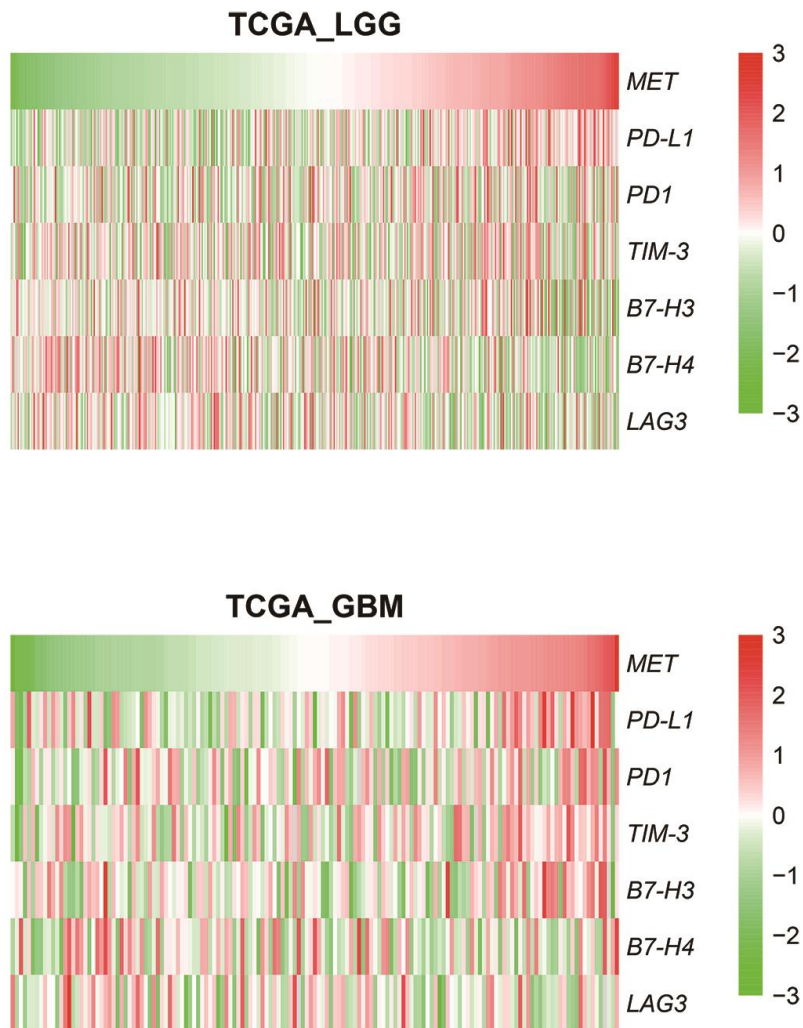

**Fig. S3** With increase of *MET* expression, the expression of *PD-L1* increases gradually in LGG and GBM.

**Fig. S4**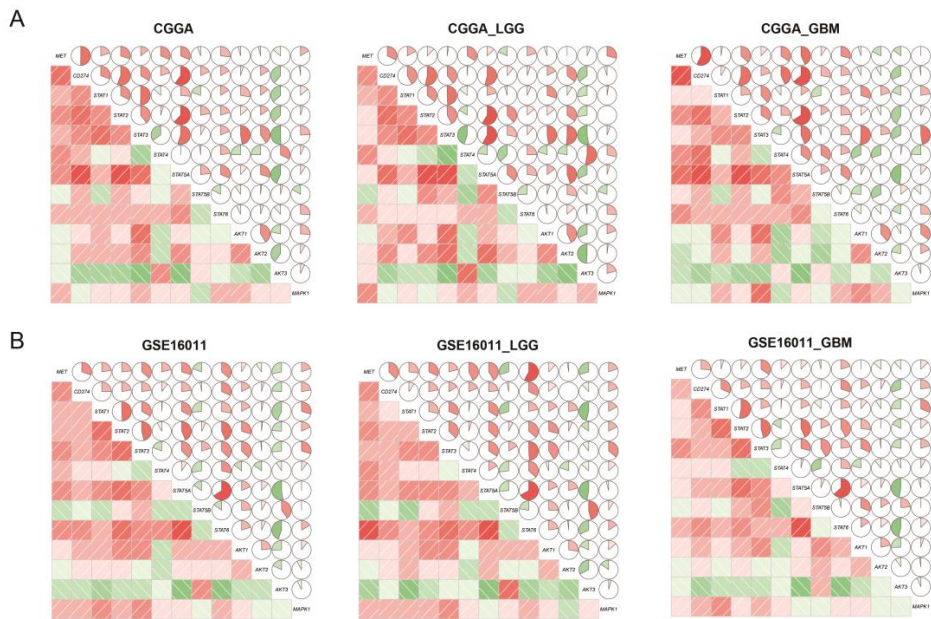

**Fig. S4** *MET/PD-L1* expression shows robust correlation with STAT pathway. **A** CGGA dataset. **B** GSE16011 dataset.

Fig. S5

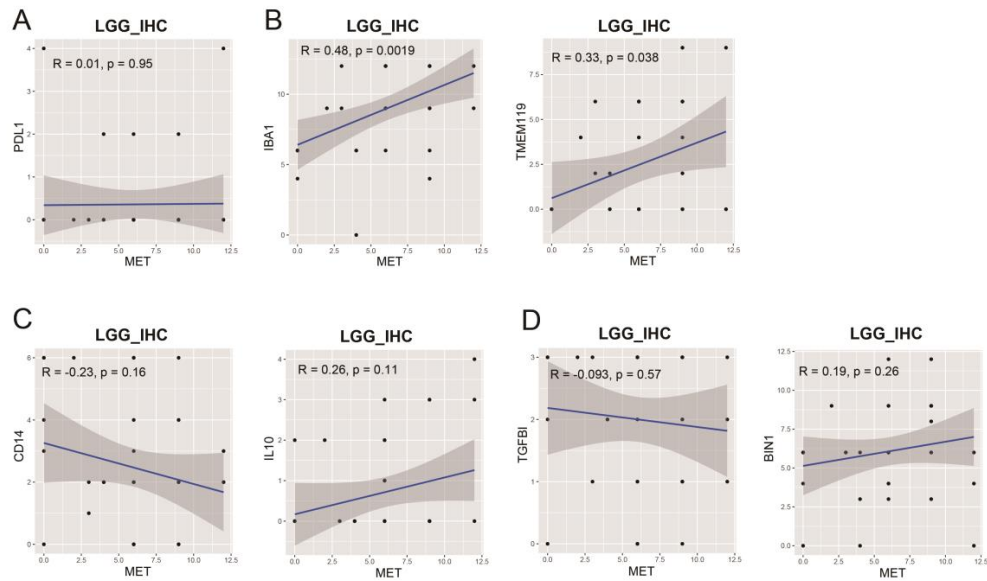

**Fig. S5** Primary glioma tissue microarray verifies the association between MET and target protein in LGG. **A** PD-L1. **B** Macrophage-associated markers (IBA1 and TMEM119). **C** M2-like polarization markers (CD14 and IL-10). **D** Blood derived-like marker (TGFBI) and resident-like marker (BIN1).

Fig. S6

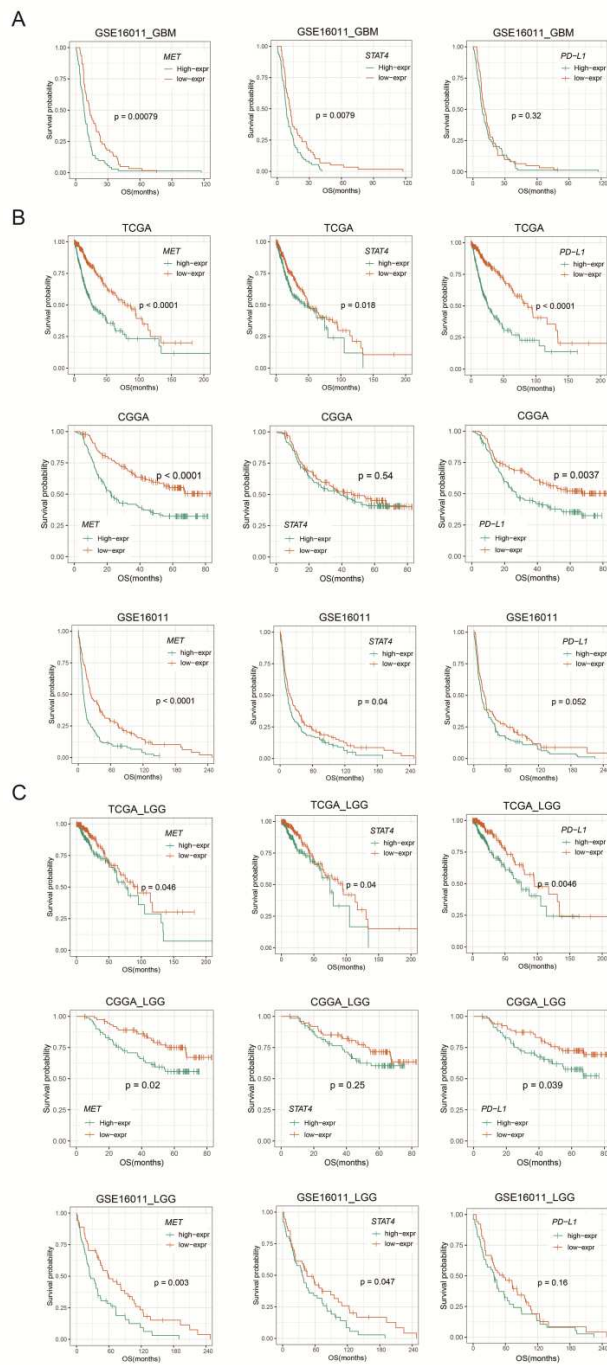

**Fig. S6** Kaplan–Meier survival analysis of *MET*, *STAT4* and *PD-L1* in GBM patients of GSE16011 dataset (A), all grade glioma (B) and LGG (C).

Fig. S7

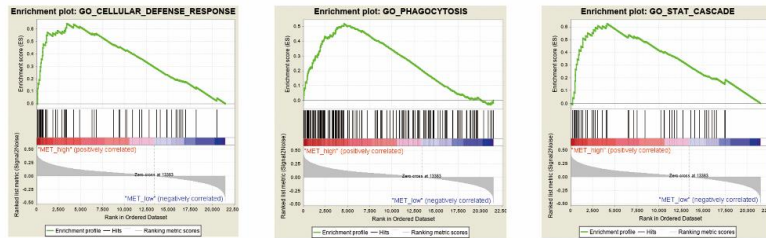

Fig. S7 Other immune-related GO terms show enrichment in *MET* high expression group.

Fig. S8

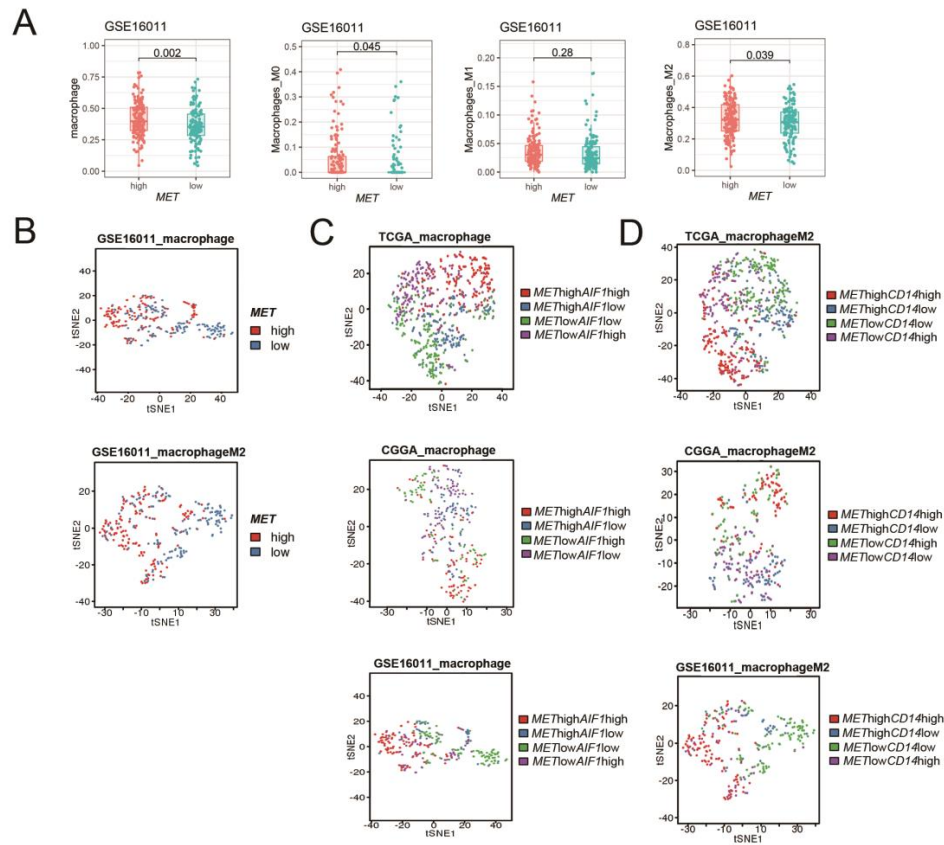

**Fig. S8 A** Determining macrophage abundance with digital cytometry in CIBERSORTx. The total fraction of macrophages and subtypes (M0, M1, M2) in *MET* high and low expression groups of GSE16011 dataset. **B** TSNE plots show macrophage and M2 macrophage expression difference between *MET* high and low groups of GSE16011 dataset. **C and D** High expression of *AIF1* or *CD14* in the *MET* high group.



Fig. S9

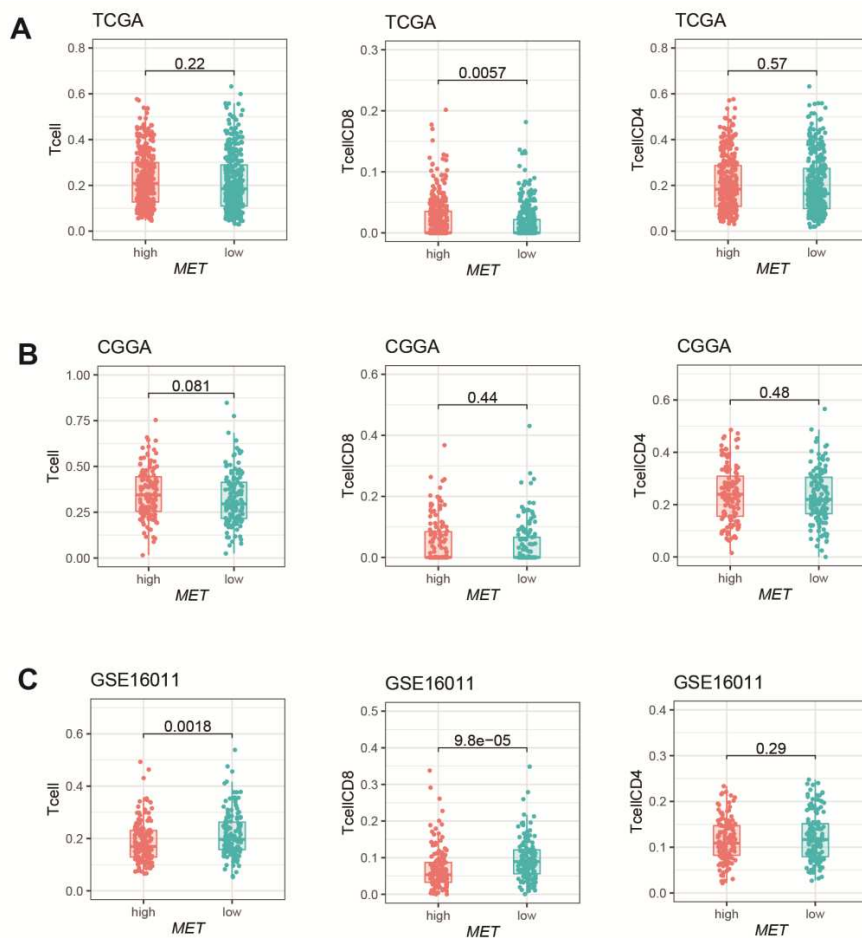

**Fig. S9** Determining T cell abundance with digital cytometry in CIBERSORTx. The total fraction of T cells, CD8<sup>+</sup> T cells and CD4<sup>+</sup> T cells in *MET* high and low expression groups in TCGA (A), CGGA (B), and GSE16011 (C) dataset.

Fig. S10

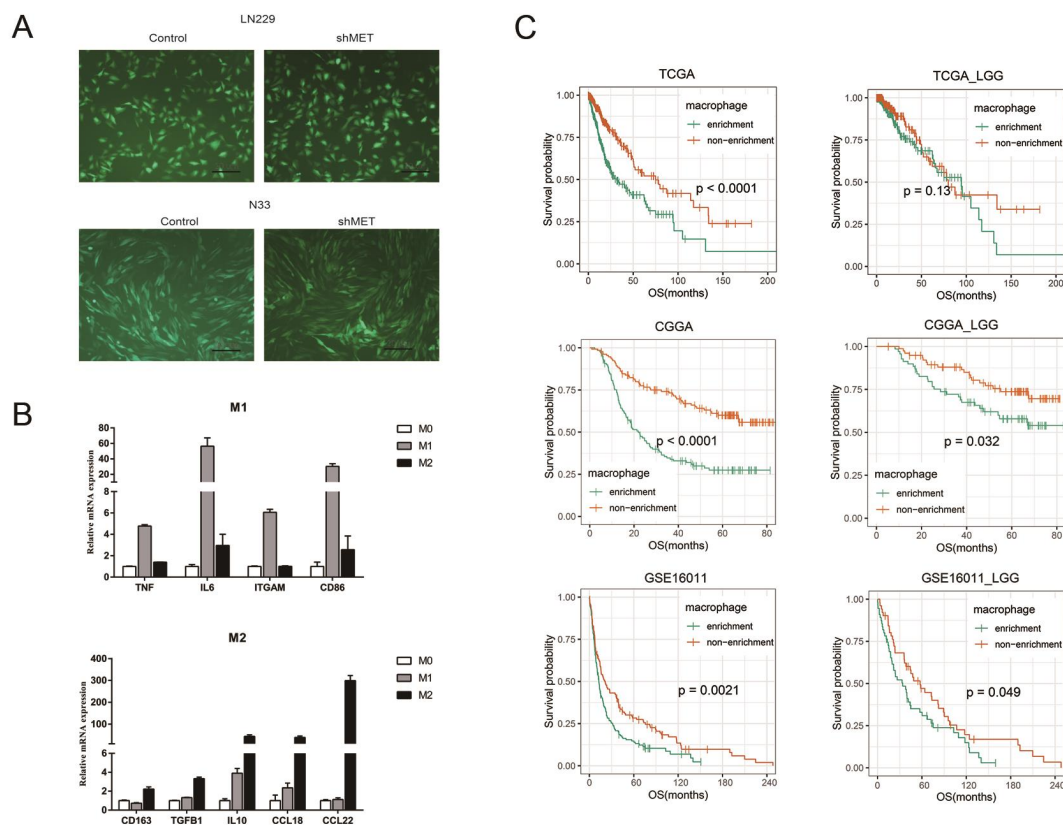

**Fig. S10 A** Fluorescent images of EGFP reporter protein in stably transfected cell lines. Scale bar, 20  $\mu$ M. **B** Appearance of the **M1-** and **M2-like phenotype** demonstrated by quantitative real-time PCR. *TNF*, *IL6*, *ITGAM* and *CD86* are highly expressed in induced M1-like macrophages. *CD163*, *TGFB1*, *IL10*, *CCL18* and *CCL22* are highly expressed in induced M2-like macrophages. **C** Glioma patients of all grade or LGG with macrophage enrichment lived significantly shorter than other patients in the three datasets.

**Table S1 Clinicopathological Characteristics of the patients**

| Variable             |                             | TCGA dataset | CGGA dataset | GSE16011 dataset |
|----------------------|-----------------------------|--------------|--------------|------------------|
| Patient number       | Total                       | 702          | 265          | 276              |
| Age                  | <45                         | 295          | 145          | 106              |
|                      | ≥45                         | 338          | 119          | 170              |
| Gender               | NA                          | 69           | 1            | 0                |
|                      | Male                        | 366          | 159          | 184              |
|                      | Female                      | 267          | 106          | 92               |
| Grade                | NA                          | 69           | 0            | 0                |
|                      | II                          | 222          | 117          | 24               |
|                      | III                         | 246          | 38           | 85               |
|                      | IV                          | 165          | 110          | 159              |
| <i>IDH1/2</i> status | NA                          | 69           | 0            | 8                |
|                      | Mutation                    | 441          | 115          | 81               |
|                      | Wild type                   | 245          | 147          | 140              |
| 1p/19q status        | NA                          | 16           | 3            | 55               |
|                      | Codeleted                   | 172          | 41           | 46               |
|                      | Intact                      | 519          | 224          | 88               |
| Histological subtype | NA                          | 11           | 0            | 142              |
|                      | Astrocytoma (II, III)       | 171          | 71           | 37               |
|                      | Oligoastrocytoma (II, III)  | 117          | 56           | 28               |
|                      | Oligodendroglioma (II, III) | 180          | 28           | 52               |
|                      | Glioblastoma (IV)           | 165          | 110          | 159              |
|                      | NA                          | 69           | 0            | 0                |

**Table S2. List of antibodies.**

| <b>Antibody</b>     | <b>Dilution</b> | <b>Source</b>  | <b>Identifier</b> | <b>Usage</b> |
|---------------------|-----------------|----------------|-------------------|--------------|
| MET                 | 1: 1000         | Cell Signaling | Cat# 8198         | WB           |
| pMET (Tyr1234/1235) | 1: 1000         | Cell Signaling | Cat# 3077         | WB           |
| PD-L1               | 1: 1000         | Abcam          | Cat# ab213524     | WB           |
| pSTAT4 (Tyr693)     | 1: 1000         | Cell Signaling | Cat# 5267         | WB           |
| STAT4               | 1: 1000         | Abcam          | Cat# ab68156      | WB           |
| pSTAT3 (Tyr705)     | 1: 2000         | Cell Signaling | Cat# 9145         | WB           |
| STAT3               | 1: 5000         | Abcam          | Cat# ab119352     | WB           |
| pSTAT6 (Tyr641)     | 1: 1000         | Cell Signaling | Cat# 56554        | WB           |
| STAT6               | 1: 1000         | Abcam          | Cat# ab32520      | WB           |
| GAPDH               | 1: 5000         | Proteintech    | Cat# 60004-1-Ig   | WB           |
| MET                 | 1: 1000         | Abcam          | Cat# ab216574     | IHC          |
| PD-L1               | 1: 1            | ZSGB Bio       | Cat# za-0629      | IHC          |
| IBA1                | 1: 2500         | Abcam          | Cat# ab178846     | IHC          |
| TMEM119             | 1: 1000         | Proteintech    | Cat# 27585-1-AP   | IHC          |
| IL10                | 1: 200          | Proteintech    | Cat# 60269-1-1g   | IHC          |
| CD14                | 1: 200          | Proteintech    | Cat# 17000-1-AP   | IHC          |
| TGFBI               | 1: 100          | Abcam          | Cat# ab170874     | IHC          |
| BIN1                | 1: 100          | Abcam          | Cat# ab182562     | IHC          |
| STAT4               | 1: 50           | Cell Signaling | Cat# 2653         | CHIP         |

WB, western blot; IHC, immunohistochemistry; CHIP, Chromatin immunoprecipitation.

**Table S3. List of primers.**

| Number | Primer Name | Sequence(5'to 3')     | Base Number |
|--------|-------------|-----------------------|-------------|
| 1      | CD86-For    | TGGAAACTGACAAGACGCGG  | 20          |
| 2      | CD86-Rev    | AAACACGCTGGGCTTCATCA  | 20          |
| 3      | CCL18-For   | CTGCTGCCTCGTCTATACCTC | 21          |
| 4      | CCL18-Rev   | GGCATAGCAGATGGGACTCT  | 20          |
| 5      | CCL22-For   | ATGGATCGCCTACAGACTGC  | 20          |
| 6      | CCL22-Rev   | CGGCACAGATCTCCTTATCCC | 21          |
| 7      | TGFB1-For   | AGCCTGAGGCCGACTACTAC  | 20          |
| 8      | TGFB1-Rev   | GGTTGCTGAGGTATCGCCAG  | 20          |
| 9      | ITGAM-For   | ATATCAGCACATCGGCCTGG  | 20          |
| 10     | ITGAM-Rev   | CTGGGCAAGGGGCACAC     | 17          |
| 11     | IL10-For    | GCCTTCAGCAGAGTGAAGACT | 21          |
| 12     | IL10-Rev    | CCACGGCCTTGCTCTTGTTT  | 20          |
| 13     | TNF-For     | CTGCTGCACTTTGGAGTGAT  | 20          |
| 14     | TNF-Rev     | GGGAGTAGATGAGGTACAGGC | 21          |
| 15     | IL6-For     | GGTACATCCTCGACGGCATC  | 20          |
| 16     | IL6-Rev     | GCTCTGGCTTGTTCCCTCACT | 20          |
| 17     | GAPDH-For   | GGTCACCAGGGCTGCTTTTA  | 20          |
| 18     | GAPDH-Rev   | TGATGACCCTTTTGGCTCCC  | 20          |
| 19     | CD163-For   | GCTGGGACAGTTACGATGCT  | 20          |
| 20     | CD163-Rev   | GGCTGCCTCCACCTCTAAGT  | 20          |
